# Supplementary material
Source: PubMed Central journal article supplement (PMC3440529)
Supplement: NIHMS393020-supplement-Supplementary_Appendix_S1.pdf [file NIHMS393020-supplement-Supplementary_Appendix_S1.pdf]

**Table A1.** A list of studies assessing the spatial scale of pathogen local adaptation. Evidence for local (mal)adaptation in one of the measured traits is taken in classification: '+' = pathogen locally adapted; '-' = parasite locally maladapted; '(') = adaptation only in some cases; 'NS' = no significant adaptation or maladaptation.

| Reference                               | Species                                                                                                            | Spatial unit | Replication (Host / Pathogen)   | Experiment               | trait measured                                   | Pathogen local adaptation |
|-----------------------------------------|--------------------------------------------------------------------------------------------------------------------|--------------|---------------------------------|--------------------------|--------------------------------------------------|---------------------------|
| Altizer 2001                            | <i>Danaus plexippus</i> (monarch butterfly) ~ <i>Ophryocystis elektroscirrha</i> (neogregarine protozoan parasite) | population   | 3                               | inoculations             | aggressiveness                                   | NS                        |
| Bevan, Crute & Clarke 1993b             | <i>Senecio vulgaris</i> (groundsel) ~ <i>Erysiphe fischeri</i> (powdery mildew fungus)                             | population   | 2                               | inoculations             | infectivity / aggressiveness                     | NS <sup>*</sup>           |
| Capelle & Neema 2005                    | <i>Phaseolus vulgaris</i> (Common bean) ~ <i>Colletotrichum lindemuthianum</i> (fungal pathogen)                   | individual   | 12                              | inoculations             | infectivity / aggressiveness                     | +                         |
| Carius, Little & Ebert 2001             | <i>Daphnia magna</i> (planktonic crustacean) ~ <i>Pasteuria ramosa</i> (bacterial endoparasite)                    | individual   | 9 (for each of two populations) | inoculations             | infectivity                                      | +                         |
| Carlsson-Granér 1997                    | <i>Silene dioica</i> (red campion) – <i>Microbotryum violaceum</i> (anther-smut fungus)                            | population   | 3                               | transplanting (host)     | infectivity                                      | (+) <sup>*</sup>          |
| Davelos, Alexander & Slade 1996         | <i>Spartina pectinata</i> ~ <i>Puccinia seymouriana</i> and <i>Puccinia sparganioides</i> (rust fungi)             | population   | 5                               | transplanting (host)     | infectivity / aggressiveness                     | NS                        |
| Ebert 1994                              | <i>Daphnia magna</i> (planktonic crustacean) ~ <i>Glugoides intestinalis</i> (microsporidium)                      | population   | 9/3                             | inoculations             | aggressiveness                                   | +                         |
| Ebert, Zschokke-Rohringer & Carius 1998 | <i>Daphnia magna</i> (planktonic crustacean) ~ <i>Pasteuria ramosa</i> (bacterial endoparasite)                    | population   | 4                               | inoculations             | infectivity / aggressiveness                     | NS                        |
| Ennos & McConnell 1995                  | <i>Pinus sylvestris</i> (Scots pine) ~ <i>Crumenulopsis sororia</i> (fungal canker)                                | population   | 3                               | transplanting (pathogen) | relative performance of strains in mixed inocula | NS                        |
| Ericson, Burdon & Müller 2002           | <i>Filipendula ulmaria</i> (meadowsweet) ~ <i>Triphragmium ulmariae</i> (rust fungus)                              | population   | 6/4                             | inoculation              | infectivity / aggressiveness                     | NS                        |

| Reference                    | Species                                                                                              | Spatial unit            | Replication (Host / Pathogen) | Experiment   | trait measured               | Pathogen local adaptation |
|------------------------------|------------------------------------------------------------------------------------------------------|-------------------------|-------------------------------|--------------|------------------------------|---------------------------|
| Ganz & Washburn 2006         | <i>Ochlerotatus sierrensis</i> (tree hole mosquito) ~ <i>Lambornella clarki</i> (protozoan parasite) | population              | 4/2 and 8/1                   | inoculations | infectivity / aggressiveness | +                         |
| Geffroy <i>et al.</i> 1999   | <i>Phaseolus vulgaris</i> (Common bean) ~ <i>Colletotrichum lindemuthianum</i> (fungal pathogen)     | region                  | 3                             | inoculations | infectivity                  | +                         |
| Hatcher, Hogg & Dunn 2005    | <i>Gammarus duebeni</i> (crustacean) ~ <i>Nosema granulosis</i> (microsporidian)                     | population              | 4                             | inoculations | infectivity / aggressiveness | +                         |
| Imhoof & Schmid-Hempel       | <i>Bombus terrestris</i> (bumblebee) ~ <i>Crithidia bombi</i> (trypanosome intestinal parasite)      | a) region b) population | a) 3, b) 3                    | inoculations | infectivity / aggressiveness | a) NS, b) NS              |
| Jarosz & Burdon 1991         | <i>Linum marginale</i> (wild flax) ~ <i>Melampsora lini</i> (rust fungus)                            | population              | 9                             | inoculations | infectivity                  | +*                        |
| Kaltz & Shykoff 2002         | <i>Silene latifolia</i> (white campion) ~ <i>Microbotryum violaceum</i> (anther-smut fungus)         | population              | 14                            | inoculations | aggressiveness               | -                         |
| Kaltz <i>et al.</i> 1999     | <i>Silene latifolia</i> (white campion) ~ <i>Microbotryum violaceum</i> (anther-smut fungus)         | population              | 6/4 and 14/14                 | inoculations | infectivity / aggressiveness | -                         |
| Laine 2005                   | <i>Plantago lanceolata</i> (ribwort plantain) ~ <i>Podosphaera plantaginis</i> (fungal pathogen)     | population              | 20/4                          | inoculations | infectivity / aggressiveness | +                         |
| Laine 2008                   | <i>Plantago lanceolata</i> (ribwort plantain) ~ <i>Podosphaera plantaginis</i> (fungal pathogen)     | population              | 3                             | inoculations | infectivity / aggressiveness | +                         |
| Meyer, Nelson & Clement 2001 | <i>Bromus tectorum</i> (cheatgrass) ~ <i>Ustilago bullata</i> (head smut fungus)                     | population              | 4                             | inoculations | infectivity                  | +                         |
| Niemi <i>et al.</i> 2006     | <i>Salix triandra</i> (almond willow) ~ <i>Melampsora amygdalinae</i> (rust fungus)                  | population              | 3                             | inoculations | infectivity                  | +                         |
| Oppliger, Vernet & Baez 1999 | <i>Gallotia galloti</i> (Canarian lizard) ~ haemogregarine genus (blood parasite)                    | population              | 3                             | inoculations | aggressiveness               | -                         |

| Reference                       | Species                                                                                                                  | Spatial unit            | Replication (Host / Pathogen) | Experiment           | trait measured               | Pathogen local adaptation                            |
|---------------------------------|--------------------------------------------------------------------------------------------------------------------------|-------------------------|-------------------------------|----------------------|------------------------------|------------------------------------------------------|
| Parker 1985                     | <i>Amphicarpaea bracteata</i> (hog peanut) ~ <i>Synchytrium decipiens</i> (fungal pathogen)                              | population              | 1                             | transplanting (host) | infectivity / aggressiveness | +                                                    |
| Parker 1989                     | <i>Podophyllum peltatum</i> (mayapple) ~ <i>Puccinia podophylli</i> (rust fungus)                                        | population              | 6                             | transplanting (host) | infectivity / aggressiveness | NS                                                   |
| Roslin, Laine & Gripenberg 2007 | <i>Quercus robur</i> (pedunculate oak) ~ <i>Erysiphe alphitoides</i> (oak powdery mildew)                                | individual              | 4                             | inoculations         | infectivity                  | +                                                    |
| Roy 1998                        | <i>Arabis holboellii</i> (rockcress) ~ <i>Puccinia monoica</i> and <i>P. thlaspeos</i> (rust fungi)                      | population              | 3                             | transplanting (host) | infectivity                  | -                                                    |
| Sicard <i>et al.</i> 2007       | <i>Phaseolus vulgaris</i> (Common bean) and <i>P. coccineus</i> ~ <i>Colletotrichum lindemuthianum</i> (fungal pathogen) | population              | 3/3 and 3/2                   | inoculations         | infectivity / aggressiveness | + ( <i>P. vulgaris</i> ), NS ( <i>P. coccineus</i> ) |
| Springer 2007                   | <i>Hesperolinon californicum</i> (California dwarf flax) ~ <i>Melampsora lini</i> (rust fungus)                          | population              | 10                            | inoculations         | infectivity                  | +                                                    |
| Thrall, Burdon & Bever 2002     | <i>Linum marginale</i> (wild flax) ~ <i>Melampsora lini</i> (rust fungus)                                                | a) region b) population | a) 3 and b) 6                 | inoculations         | infectivity                  | a) +, b) +                                           |
| Wennström & Ericson 1994        | <i>Lactuca sibirica</i> (lettuce) ~ <i>Puccinia minussensis</i> (rust fungus)                                            | population              | 5/1                           | inoculations         | infectivity / aggressiveness | +                                                    |

\* As reported by Kaltz & Shykoff 1998
